# Supplementary material for: Electronic structures and second hyperpolarizabilities of alkaline earth metal complexes end-capped with NA2 (A = H, Li, Na)
Source: Royal Society of Chemistry journal article supplement (doi:10.1039/c5cp07661g), 2016-01-01
Supplement: c5cp07661g1.pdf [file c5cp07661g1.pdf]

# Electronic Structure and Second Hyperpolarizability of Alkaline Earth Metal Complexes End-capped With $\text{NA}_2$ (A=H, Li, Na)

Paramita Banerjee and Prasanta K. Nandi\*  
Department of Chemistry,  
Indian Institute of Engineering Science and Technology, Shibpur  
Howrah- 711103, India

\*Corresponding author's email: [nandi\\_pk@yahoo.co.in](mailto:nandi_pk@yahoo.co.in)

**Table S1.** Longitudinal component of second hyperpolarizability ( $\gamma_{xxxx}$ ,  $10^4$  au) and the average second hyperpolarizability ( $\gamma_{av}$ ,  $10^4$  au) of complexes (Scheme 1(A-C)) obtained at the CAM-B3LYP/6-311++G(3df,3pd) level for different electric field strength (au)

| Molecules | 0.000033        |               | 0.000133        |               | 0.000233        |               | 0.000333(Default) |               | 0.000433        |               | 0.000500        |               | 0.000567        |               |
|-----------|-----------------|---------------|-----------------|---------------|-----------------|---------------|-------------------|---------------|-----------------|---------------|-----------------|---------------|-----------------|---------------|
|           | $\gamma_{xxxx}$ | $\gamma_{av}$ | $\gamma_{xxxx}$ | $\gamma_{av}$ | $\gamma_{xxxx}$ | $\gamma_{av}$ | $\gamma_{xxxx}$   | $\gamma_{av}$ | $\gamma_{xxxx}$ | $\gamma_{av}$ | $\gamma_{xxxx}$ | $\gamma_{av}$ | $\gamma_{xxxx}$ | $\gamma_{av}$ |
| <b>1a</b> | 4.50            | 2.77          | 4.50            | 2.78          | 4.50            | 2.78          | 4.50              | 2.78          | 4.50            | 2.78          | 4.50            | 2.78          | 4.50            | 2.78          |
| <b>1b</b> | 98.30           | 65.15         | 98.69           | 65.14         | 99.59           | 65.08         | 101.24            | 64.95         | 103.82          | 64.94         | 105.52          | 65.13         | 105.16          | 64.87         |
| <b>1c</b> | 204.12          | 169.88        | 204.30          | 169.94        | 204.37          | 169.63        | 204.51            | 168.74        | 204.54          | 167.60        | 204.51          | 167.15        | 204.49          | 167.02        |
| <b>2a</b> | 8.18            | 5.39          | 8.18            | 5.40          | 8.18            | 5.40          | 8.18              | 5.40          | 8.18            | 5.40          | 8.18            | 5.40          | 8.18            | 5.40          |
| <b>2b</b> | 270.32          | 121.86        | 270.77          | 122.02        | 271.80          | 122.43        | 272.99            | 122.89        | 273.95          | 123.25        | 273.78          | 123.25        | 271.02          | 122.58        |
| <b>2c</b> | 625.87          | 323.18        | 626.43          | 323.14        | 626.94          | 323.24        | 627.76            | 323.37        | 629.35          | 347.87        | 644.66          | 319.86        | 424.51          | 223.50        |
| <b>3a</b> | 13.23           | 8.65          | 13.23           | 8.65          | 13.23           | 8.65          | 13.24             | 8.65          | 13.24           | 8.65          | 13.24           | 8.65          | 13.24           | 8.65          |
| <b>3b</b> | 504.47          | 182.26        | 504.75          | 182.27        | 505.24          | 182.41        | 506.09            | 182.65        | 507.00          | 182.92        | 507.68          | 183.13        | 508.31          | 183.33        |
| <b>3c</b> | 1341.50         | 517.73        | 1342.61         | 518.11        | 1344.45         | 518.61        | 1347.16           | 519.35        | 1350.92         | 520.39        | 1353.78         | 521.21        | 1357.08         | 522.14        |
| <b>4a</b> | 22.73           | 15.25         | 22.76           | 15.26         | 22.77           | 15.26         | 22.79             | 15.26         | 22.79           | 15.26         | 22.80           | 15.31         | 22.80           | 14.78         |
| <b>4b</b> | 812.33          | 337.55        | 812.92          | 337.67        | 813.95          | 338.00        | 815.52            | 338.50        | 817.74          | 339.20        | 819.54          | 339.78        | 821.60          | 340.46        |
| <b>4c</b> | 1886.24         | 794.98        | 1888.71         | 795.62        | 1896.90         | 797.80        | 2009.43           | 823.35        | 1894.35         | 798.56        | 1900.86         | 800.06        | 1903.92         | 801.05        |
| <b>5a</b> | 31.30           | 20.93         | 31.30           | 20.93         | 31.31           | 20.93         | 31.32             | 20.93         | 31.33           | 20.94         | 31.34           | 20.94         | 31.35           | 20.95         |
| <b>5b</b> | 1343.01         | 450.95        | 1344.94         | 4514.29       | 1348.37         | 452.31        | 1353.42           | 453.57        | 1357.96         | 454.67        | 1357.04         | 453.37        | 1349.13         | 452.39        |
| <b>5c</b> | 3049.72         | 1004.05       | 3264.44         | 1123.02       | 3258.56         | 1136.36       | 3265.75           | 1138.44       | 3278.62         | 1144.01       | 3288.25         | 1145.80       | 3308.87         | 1151.11       |
| <b>6a</b> | 47.28           | 43.22         | 47.28           | 43.23         | 47.32           | 47.28         | 47.36             | 43.33         | 47.41           | 43.38         | 47.45           | 43.40         | 47.50           | 43.41         |
| <b>6b</b> | 2681.69         | 947.99        | 2683.59         | 948.57        | 2688.88         | 950.10        | 2695.94           | 952.19        | 2706.09         | 955.13        | 2714.19         | 957.51        | 2723.25         | 960.17        |
| <b>6c</b> | 5909.13         | 2061.23       | 5352.30         | 1954.68       | 5438.68         | 1987.97       | 5574.78           | 2025.11       | 5629.93         | 2023.96       | 5628.04         | 2015.83       | 5619.29         | 2015.65       |

**Table S2.** Longitudinal component of second hyperpolarizability ( $\gamma_{xxxx}$ ,  $10^7$  au) and the average second hyperpolarizability ( $\gamma_{av}$ ,  $10^7$  au) of complexes (**Scheme 2C**) obtained at the CAM-B3LYP/6-311++G(3df,3pd) level for different electric field strength (au)

| n                                                       | 0.000033        |               | 0.000133        |               | 0.000233        |               | 0.000333(Default) |               | 0.000433        |               | 0.000500        |               | 0.000567        |               |
|---------------------------------------------------------|-----------------|---------------|-----------------|---------------|-----------------|---------------|-------------------|---------------|-----------------|---------------|-----------------|---------------|-----------------|---------------|
|                                                         | $\gamma_{xxxx}$ | $\gamma_{av}$ | $\gamma_{xxxx}$ | $\gamma_{av}$ | $\gamma_{xxxx}$ | $\gamma_{av}$ | $\gamma_{xxxx}$   | $\gamma_{av}$ | $\gamma_{xxxx}$ | $\gamma_{av}$ | $\gamma_{xxxx}$ | $\gamma_{av}$ | $\gamma_{xxxx}$ | $\gamma_{av}$ |
| <i>Na<sub>2</sub>N-(Mg)<sub>n</sub>-NNa<sub>2</sub></i> |                 |               |                 |               |                 |               |                   |               |                 |               |                 |               |                 |               |
| <b>3</b>                                                | 3.67            | 1.09          | 3.67            | 1.09          | 3.68            | 1.09          | 3.69              | 1.10          | 3.70            | 1.10          | 3.71            | 1.11          | 3.72            | 1.11          |
| <b>4</b>                                                | 7.70            | 2.03          | 7.71            | 2.03          | 7.73            | 2.04          | 7.77              | 2.04          | 7.80            | 2.05          | 7.84            | 2.06          | 7.88            | 2.07          |
| <b>5</b>                                                | 13.59           | 3.32          | 13.61           | 3.33          | 13.66           | 3.34          | 13.74             | 3.36          | 13.85           | 3.38          | 13.94           | 3.40          | 14.04           | 3.42          |
| <b>6</b>                                                | 21.07           | 4.92          | 21.12           | 4.93          | 21.23           | 4.95          | 21.40             | 4.99          | 21.64           | 5.04          | 21.83           | 5.08          | 22.05           | 5.13          |
| <b>7</b>                                                | 30.04           | 6.70          | 30.04           | 6.79          | 30.24           | 6.83          | 30.56             | 6.90          | 30.99           | 6.99          | 31.35           | 7.07          | 31.77           | 7.16          |
| <i>Na<sub>2</sub>N-(Ca)<sub>n</sub>-NNa<sub>2</sub></i> |                 |               |                 |               |                 |               |                   |               |                 |               |                 |               |                 |               |
| <b>3</b>                                                | 15.45           | 4.71          | 15.42           | 4.71          | 15.37           | 4.70          | 15.42             | 4.70          | 15.43           | 4.71          | 15.47           | 4.69          | 15.71           | 4.75          |
| <b>4</b>                                                | 29.68           | 6.98          | 30.33           | 8.29          | 30.82           | 8.53          | 30.97             | 8.51          | 32.11           | 8.72          | -----           | -----         | 31.27           | 8.60          |
| <b>5</b>                                                | 54.17           | 13.78         | 52.46           | 13.45         | 53.88           | 13.74         | 53.41             | 13.64         | 53.54           | 13.70         | 54.41           | 13.87         | 55.07           | 14.03         |
| <b>6</b>                                                | 81.41           | 19.86         | 81.36           | 19.85         | 82.33           | 20.05         | 82.60             | 20.10         | 84.69           | 20.60         | 83.77           | 20.40         | 85.70           | 20.79         |
| <b>7</b>                                                | 114.74          | 27.13         | 113.29          | 26.81         | 115.31          | 27.24         | 117.75            | 27.92         | 120.67          | 28.24         | 121.48          | 28.44         | 124.91          | 29.26         |

**Scheme 3** (Optimized structures along with geometrical parameters of non-linear metal complexes)

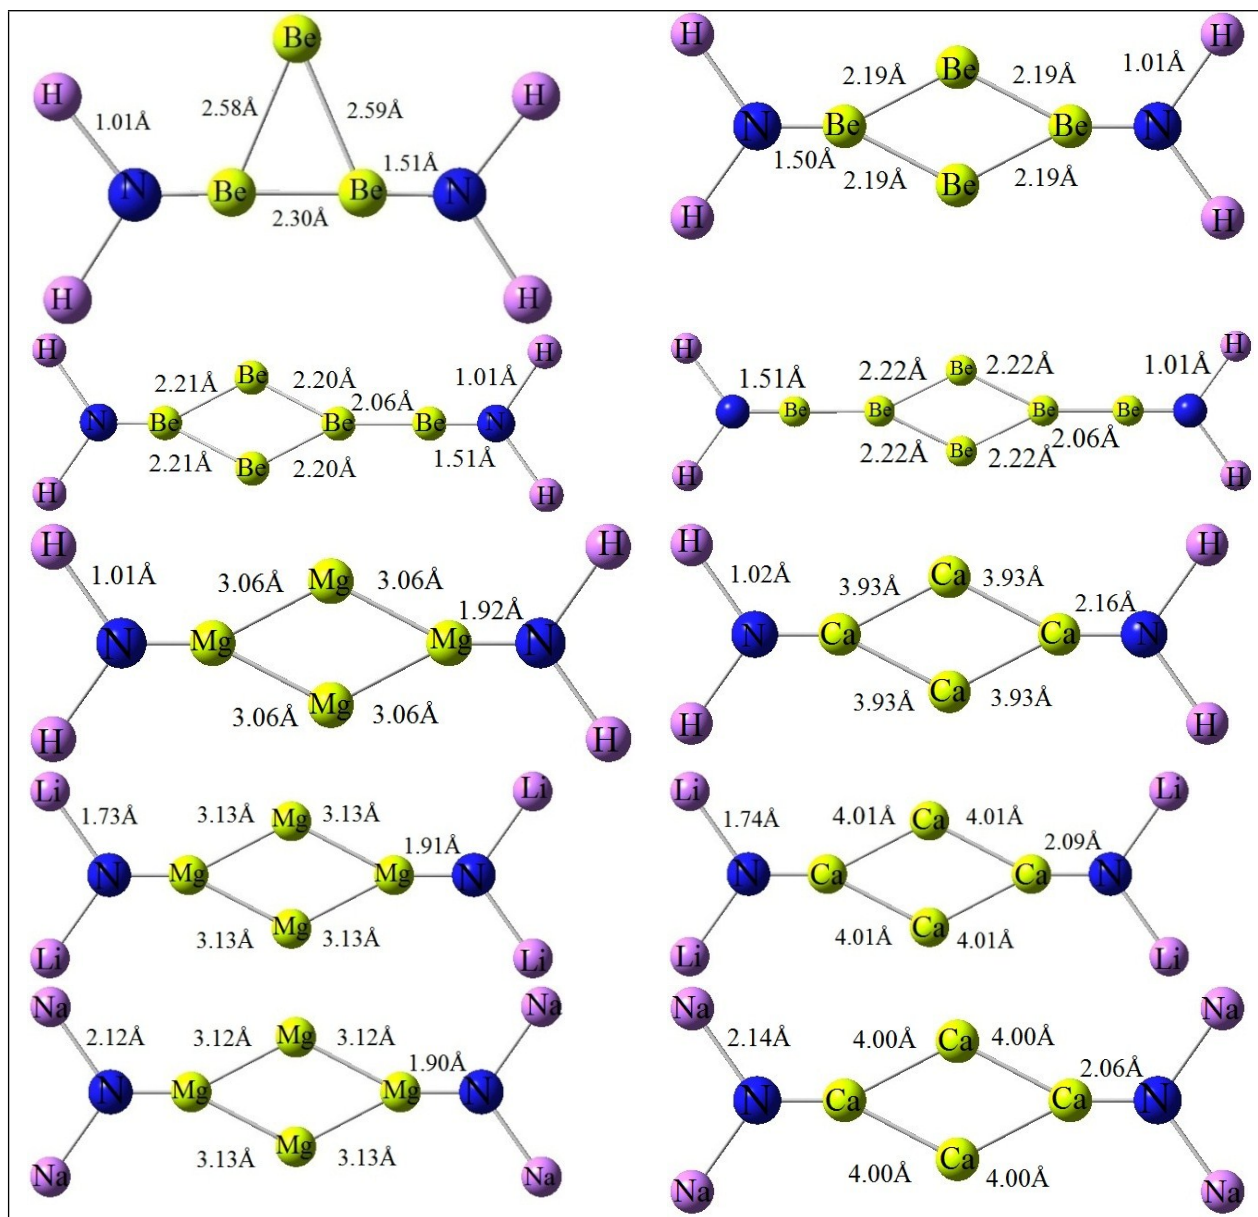

**Table S3** B3LYP/6-311++G(d, p) optimized energy (a.u.), relative energy ( $\Delta E$ , kcal/mol), longitudinal component of linear polarizability ( $\alpha_{xx}$ ,  $10^2$  au) and of second hyperpolarizability ( $\gamma_{xxxx}$ ,  $10^4$  au)<sup>a</sup> of linear structures and non-linear structural isomers.

| Linear structures                                 |                |               |                 | Non-linear Isomers |               |                         |            |
|---------------------------------------------------|----------------|---------------|-----------------|--------------------|---------------|-------------------------|------------|
| Molecules                                         | Energy         | $\alpha_{xx}$ | $\gamma_{xxxx}$ | Energy             | $\alpha_{xx}$ | $\gamma_{xxxx}$         | $\Delta E$ |
| <b>Be<sub>3</sub>(NH<sub>2</sub>)<sub>2</sub></b> | -156.250666843 | 0.97          | 10.45           | -156.208061655     | 1.56          | 15.70/2.30 <sup>b</sup> | 26.735     |
| <b>Be<sub>4</sub>(NH<sub>2</sub>)<sub>2</sub></b> | -170.968491260 | 1.26          | 16.99           | -170.954940625     | 1.82          | 22.28                   | 8.503      |
| <b>Be<sub>5</sub>(NH<sub>2</sub>)<sub>2</sub></b> | -185.686167293 | 1.56          | 23.17           | -185.678090180     | 2.30          | 26.78/9.00 <sup>b</sup> | 5.068      |
| <b>Be<sub>6</sub>(NH<sub>2</sub>)<sub>2</sub></b> | -200.403786408 | 1.85          | 29.21           | -200.400040106     | 2.79          | 44.85                   | 2.351      |
| <b>Mg<sub>4</sub>(NH<sub>2</sub>)<sub>2</sub></b> | -912.391572038 | 4.46          | 188.98          | -912.396377770     | 3.06          | 76.27                   | -3.015     |
| <b>Mg<sub>4</sub>(NLi)<sub>2</sub></b>            | -940.060484065 | 8.69          | 3238.86         | -940.066103242     | 5.97          | 904.50                  | -3.526     |
| <b>Mg<sub>4</sub>(NNa)<sub>2</sub></b>            | -1559.08295552 | 12.87         | 7766.52         | -1559.08824972     | 8.80          | 2154.89                 | -3.322     |
| <b>Ca<sub>4</sub>(NH<sub>2</sub>)<sub>2</sub></b> | -2822.35484769 | 12.03         | 886.70          | -2822.37487804     | 5.93          | 238.09                  | -12.579    |
| <b>Ca<sub>4</sub>(NLi)<sub>2</sub></b>            | -2850.02044187 | 22.45         | 18244.60        | -2850.03929508     | 10.79         | 3890.08                 | -11.830    |
| <b>Ca<sub>4</sub>(NNa)<sub>2</sub></b>            | -3469.04858800 | 31.12         | 30975.50        | -3469.06601699     | 15.01         | 8360.35                 | -10.937    |

<sup>a</sup>The linear and non-linear polarizabilities are calculated at the CAM-B3LYP Level for the 6-311++G(3df,3pd) basis set.

<sup>b</sup>The quantity in the parentheses refers to the magnitude of first hyperpolarizability ( $\beta_{xxx}$ ) in  $10^2$  au.

**Table S4** The B3LYP/ 6-311++G(d,p) calculated binding energy ( $\Delta E$ , kJ/mol)<sup>a</sup> of the complexes (**Schemes 2A**) with increasing chain length.

| <b>n</b>                                          | $\Delta E$ | <b>n</b>                                          | $\Delta E$ | <b>n</b>                                          | $\Delta E$ |
|---------------------------------------------------|------------|---------------------------------------------------|------------|---------------------------------------------------|------------|
| <b>Be<sub>n</sub>(NH<sub>2</sub>)<sub>2</sub></b> |            | <b>Mg<sub>n</sub>(NH<sub>2</sub>)<sub>2</sub></b> |            | <b>Ca<sub>n</sub>(NH<sub>2</sub>)<sub>2</sub></b> |            |
| <b>B3LYP</b>                                      |            |                                                   |            |                                                   |            |
| <b>2</b>                                          | -640.41    | <b>2</b>                                          | -185.41    | <b>2</b>                                          | -273.19    |
| <b>3</b>                                          | -759.42    | <b>3</b>                                          | -193.59    | <b>3</b>                                          | -282.83    |
| <b>4</b>                                          | -876.74    | <b>4</b>                                          | -200.49    | <b>4</b>                                          | -292.33    |
| <b>5</b>                                          | -988.15    | <b>5</b>                                          | -206.61    | <b>5</b>                                          | -301.42    |
| <b>6</b>                                          | -1109.09   | <b>6</b>                                          | -212.56    | <b>6</b>                                          | -310.86    |
| <b>7</b>                                          | -1226.05   | <b>7</b>                                          | -218.28    | <b>7</b>                                          | -320.04    |
| <b>CAM-B3LYP</b>                                  |            |                                                   |            |                                                   |            |
| <b>2</b>                                          | -668.73    | <b>2</b>                                          | -215.75    | <b>2</b>                                          | -298.58    |
| <b>3</b>                                          | -791.51    | <b>3</b>                                          | -225.20    | <b>3</b>                                          | -310.95    |
| <b>4</b>                                          | -912.09    | <b>4</b>                                          | -232.52    | <b>4</b>                                          | -322.55    |
| <b>5</b>                                          | -986.53    | <b>5</b>                                          | -238.60    | <b>5</b>                                          | -333.28    |
| <b>6</b>                                          | -1151.43   | <b>6</b>                                          | -244.24    | <b>6</b>                                          | -339.40    |
| <b>7</b>                                          | -1271.89   | <b>7</b>                                          | -249.51    | <b>7</b>                                          | -354.11    |

<sup>a</sup>2M+N<sub>2</sub>+2H<sub>2</sub> = M<sub>n</sub>(NH<sub>2</sub>)<sub>2</sub> (M= Be, Mg and Ca)

**Table S5** The DFT/ 6-311++G(d,p) calculated results of binding energy ( $\Delta E$ , kJ/mol)<sup>a</sup> of the complexes (**Schemes 2B** and **2C**) with increasing chain length

| <b>n</b>                                           | $\Delta E$ | <b>n</b>                                           | $\Delta E$ | <b>n</b>                                           | $\Delta E$ |
|----------------------------------------------------|------------|----------------------------------------------------|------------|----------------------------------------------------|------------|
| <b>Mg<sub>n</sub>(NLi<sub>2</sub>)<sub>2</sub></b> |            | <b>Ca<sub>n</sub>(NLi<sub>2</sub>)<sub>2</sub></b> |            | <b>Ca<sub>n</sub>(NNa<sub>2</sub>)<sub>2</sub></b> |            |
| <b>B3LYP</b>                                       |            |                                                    |            |                                                    |            |
| <b>2</b>                                           | -390.97    | <b>2</b>                                           | -466.73    | <b>2</b>                                           | -71.73     |
| <b>3</b>                                           | -397.12    | <b>3</b>                                           | -474.18    | <b>3</b>                                           | -80.31     |
| <b>4</b>                                           | -402.43    | <b>4</b>                                           | -483.48    | <b>4</b>                                           | -89.77     |
| <b>5</b>                                           | -407.64    | <b>5</b>                                           | -492.45    | <b>5</b>                                           | -98.96     |
| <b>6</b>                                           | -412.87    | <b>6</b>                                           | -501.37    | <b>6</b>                                           | -107.83    |
| <b>7</b>                                           | -418.14    | <b>7</b>                                           | -510.32    | <b>7</b>                                           | -116.79    |
| <b>CAM-B3LYP</b>                                   |            |                                                    |            |                                                    |            |
| <b>2</b>                                           | -402.63    | <b>2</b>                                           | -466.56    | <b>2</b>                                           | -45.09     |
| <b>3</b>                                           | -408.01    | <b>3</b>                                           | -475.61    | <b>3</b>                                           | -54.44     |
| <b>4</b>                                           | -413.15    | <b>4</b>                                           | -486.80    | <b>4</b>                                           | -65.88     |
| <b>5</b>                                           | -417.90    | <b>5</b>                                           | -497.06    | <b>5</b>                                           | -75.82     |
| <b>6</b>                                           | -422.70    | <b>6</b>                                           | -507.17    | <b>6</b>                                           | -86.29     |
| <b>7</b>                                           | -427.27    | <b>7</b>                                           | -516.52    | <b>7</b>                                           | -96.32     |

<sup>a</sup> $2M+N_2+4A=M_n(NA_2)_2$  (A = Li and Na)

**Table S6** Calculated results of dipole polarizability anisotropy ( $\Delta\alpha$ ,  $10^2$  au)

obtained for molecules of **Schemes 1(A-C)** at the CAM-B3LYP level for different basis sets.

---

| <b>6-311++G(3df,3pd)</b> |      |           |      |           |      |
|--------------------------|------|-----------|------|-----------|------|
| <b>1a</b>                | 0.17 | <b>1b</b> | 0.54 | <b>1c</b> | 0.49 |
| <b>2a</b>                | 0.24 | <b>2b</b> | 0.98 | <b>2c</b> | 1.40 |
| <b>3a</b>                | 0.37 | <b>3b</b> | 1.61 | <b>3c</b> | 2.75 |
| <b>4a</b>                | 0.31 | <b>4b</b> | 1.57 | <b>4c</b> | 2.75 |
| <b>5a</b>                | 0.51 | <b>5b</b> | 2.53 | <b>5c</b> | 4.68 |
| <b>6a</b>                | 0.87 | <b>6b</b> | 3.78 | <b>6c</b> | 6.84 |

  

| <b>aug-pc-2</b> |      |           |      |           |      |
|-----------------|------|-----------|------|-----------|------|
| <b>1a</b>       | 0.17 | <b>1b</b> | 0.54 | <b>1c</b> | 0.49 |
| <b>2a</b>       | 0.24 | <b>2b</b> | 0.98 | <b>2c</b> | 1.40 |
| <b>3a</b>       | 0.37 | <b>3b</b> | 1.62 | <b>3c</b> | 2.78 |
| <b>4a</b>       | 0.30 | <b>4b</b> | 1.59 | <b>4c</b> | 2.83 |
| <b>5a</b>       | 0.52 | <b>5b</b> | 2.56 | <b>5c</b> | 4.78 |
| <b>6a</b>       | 0.89 | <b>6b</b> | 3.83 | <b>6c</b> | 7.03 |

---



**Table S7.** Longitudinal component of polarizability ( $a_{xx}$ ,  $10^2$  au), second hyperpolarizability ( $\gamma_{xxxx}$ ,  $10^4$  au) and average second hyperpolarizability ( $\gamma_{av}$ ,  $10^4$  au) of complexes (**Schemes 1(A-C)**) at the obtained for the **wB97XD** functional at different basis sets

| wB97XD    |               |                 |               |                   |                 |               |                          |                 |               |          |                 |               |
|-----------|---------------|-----------------|---------------|-------------------|-----------------|---------------|--------------------------|-----------------|---------------|----------|-----------------|---------------|
|           | 6-311++G(d,p) |                 |               | 6-311++G(3df,3pd) |                 |               | aug-cc-pVTZ <sup>a</sup> |                 |               | aug-pc-2 |                 |               |
| <b>X</b>  | $a_{xx}$      | $\gamma_{xxxx}$ | $\gamma_{av}$ | $a_{xx}$          | $\gamma_{xxxx}$ | $\gamma_{av}$ | $a_{xx}$                 | $\gamma_{xxxx}$ | $\gamma_{av}$ | $a_{xx}$ | $\gamma_{xxxx}$ | $\gamma_{av}$ |
| <b>1a</b> | 0.67          | 4.326           | 2.48          | 0.69              | 4.38            | 2.78          | 0.69                     | 4.45            | 3.20          | 0.69     | 4.53            | 3.12          |
| <b>1b</b> | 1.82          | 95.33           | 70.46         | 1.86              | 97.37           | 64.95         | 1.85                     | 82.38           | 59.46         | 1.84     | 92.01           | 66.92         |
| <b>1c</b> | 2.65          | 208.36          | 210.23        | 2.66              | 202.91          | 168.74        | 2.69                     | 223.26          | 221.60        | 2.68     | 213.27          | 209.98        |
| <b>2a</b> | 0.89          | 7.65            | 4.62          | 0.91              | 7.67            | 5.40          | 0.92                     | 7.970           | 6.13          | 0.92     | 8.17            | 5.99          |
| <b>2b</b> | 2.58          | 191.90          | 99.04         | 2.62              | 253.11          | 122.89        | 2.62                     | 230.89          | 120.85        | 2.59     | 123.41          | 233.08        |
| <b>2c</b> | 4.05          | 558.75          | 762.36        | 5.77              | 536.80          | 323.37        | 4.12                     | 588.32          | 394.63        | 4.06     | 573.77          | 373.16        |
| <b>3a</b> | 1.19          | 12.30           | 7.43          | 1.22              | 11.99           | 8.65          | 1.23                     | 12.68           | 10.16         | 1.23     | 12.75           | 9.33          |
| <b>3b</b> | 3.49          | 427.14          | 179.45        | 3.55              | 395.38          | 182.65        | 3.54                     | 425.45          | 174.83        | 3.49     | 430.97          | 180.02        |
| <b>3c</b> | 5.81          | 1222.96         | 571.81        | 5.77              | 1249.88         | 519.35        | 5.91                     | 1268.28         | 609.80        | 5.79     | 1215.39         | 571.36        |
| <b>4a</b> | 1.15          | 22.85           | 14.79         | 1.19              | 24.48           | 15.26         | 1.21                     | 24.09           | 18.72         | 1.21     | 24.22           | 19.13         |
| <b>4b</b> | 3.61          | 644.85          | 306.95        | 3.65              | 635.93          | 338.50        | 3.67                     | 609.15          | 285.34        | 3.65     | 673.09          | 325.68        |
| <b>4c</b> | 5.73          | 1619.35         | 802.05        | 5.66              | 1578.35         | 823.35        | 5.85                     | 1963.71         | 929.55        | 5.78     | 1649.86         | 829.11        |
| <b>5a</b> | 1.61          | 32.46           | 20.11         | 1.67              | 34.18           | 20.93         | 1.69                     | 34.38           | 25.69         | 1.70     | 34.02           | 26.06         |
| <b>5b</b> | 4.87          | 1000.95         | 376.14        | 4.94              | 1019.66         | 453.57        | 4.96                     | 1020.30         | 384.01        | 4.89     | 1060.78         | 401.68        |
| <b>5c</b> | 8.10          | 2636.57         | 1080.09       | 7.99              | 2591.61         | 1138.44       | 8.28                     | 2871.94         | 1194.86       | 8.15     | 2734.80         | 1123.18       |
| <b>6a</b> | 2.63          | 12.25           | 26.78         | 2.75              | 14.03           | 43.33         | 2.68                     | 6.68            | 30.11         | 2.79     | 12.57           | 21.37         |
| <b>6b</b> | 6.98          | 1775.96         | 717.17        | 7.09              | 1880.99         | 952.19        | 7.13                     | 1909.90         | 807.15        | 958.42   | 2048.62         | 849.91        |
| <b>6c</b> | 10.90         | 4525.10         | 1827.54       | 10.86             | 4668.44         | 2025.11       | 11.24                    | 4948.37         | 1911.10       | 11.12    | 4922.60         | 2031.88       |

<sup>a</sup>For Ca atom aug-pc-2 basis set has been used.

**Table S8.** Longitudinal component of polarizability ( $\alpha_{xx}$ ,  $10^2$  au), second hyperpolarizability ( $\gamma_{xxxx}$ ,  $10^4$  au) and average second hyperpolarizability ( $\gamma_{av}$ ,  $10^4$  au) of complexes (**Schemes 1(A-C)**) obtained for the **B2PLYP** functional at different basis sets

| <b>B2PLYP</b> |                      |                 |               |                          |                 |               |                                |                 |               |                 |                 |               |
|---------------|----------------------|-----------------|---------------|--------------------------|-----------------|---------------|--------------------------------|-----------------|---------------|-----------------|-----------------|---------------|
|               | <b>6-311++G(d,p)</b> |                 |               | <b>6-311++G(3df,3pd)</b> |                 |               | <b>aug-cc-pVTZ<sup>a</sup></b> |                 |               | <b>aug-pc-2</b> |                 |               |
| <b>X</b>      | $\alpha_{xx}$        | $\gamma_{xxxx}$ | $\gamma_{av}$ | $\alpha_{xx}$            | $\gamma_{xxxx}$ | $\gamma_{av}$ | $\alpha_{xx}$                  | $\gamma_{xxxx}$ | $\gamma_{av}$ | $\alpha_{xx}$   | $\gamma_{xxxx}$ | $\gamma_{av}$ |
| <b>1a</b>     | 0.65                 | 4.099           | 2.25          | 0.66                     | 4.147           | 2.63          | 0.66                           | 4.18            | 2.82          | 0.66            | 4.27            | 2.75          |
| <b>1b</b>     | 1.71                 | 103.32          | 69.84         | 1.74                     | 97.64           | 61.01         | 1.74                           | 106.72          | 69.60         | 1.74            | 112.29          | 71.91         |
| <b>1c</b>     | 2.55                 | 248.84          | 219.66        | 2.25                     | 240.50          | 214.14        | 2.60                           | 255.34          | 228.52        | 2.57            | 244.89          | 218.13        |
| <b>2a</b>     | 0.86                 | 7.752           | 4.44          | 0.88                     | 7.82            | 5.35          | 0.89                           | 8.08            | 5.71          | 0.89            | 8.21            | 5.53          |
| <b>2b</b>     | 2.46                 | 281.12          | 130.72        | 2.50                     | 303.08          | 142.09        | 2.51                           | 303.97          | 143.42        | 2.50            | 143.50          | 306.73        |
| <b>2c</b>     | 3.99                 | 849.99          | 469.13        | 2.97                     | 819.79          | 453.66        | 4.06                           | 864.93          | 477.65        | 4.02            | 842.91          | 462.30        |
| <b>3a</b>     | 1.20                 | 13.15           | 7.15          | 1.18                     | 12.86           | 8.79          | 1.19                           | 13.52           | 9.60          | 1.19            | 13.61           | 8.90          |
| <b>3b</b>     | 3.36                 | 552.23          | 209.44        | 3.41                     | 581.52          | 216.57        | 3.42                           | 576.61          | 215.64        | 3.42            | 584.25          | 216.56        |
| <b>3c</b>     | 5.77                 | 1834.33         | 745.16        | 5.73                     | 1769.40         | 724.80        | 5.87                           | 1834.33         | 765.68        | 5.81            | 1815.25         | 736.81        |
| <b>4a</b>     | 1.12                 | 23.09           | 14.54         | 1.19                     | 23.20           | 16.22         | 1.20                           | 23.48           | 18.77         | 1.20            | 24.00           | 18.67         |
| <b>4b</b>     | 3.63                 | 1025.56         | 421.44        | 3.69                     | 1055.11         | 436.10        | 3.71                           | 1040.77         | 439.93        | 3.71            | 1085.77         | 449.41        |
| <b>4c</b>     | 6.46                 | 2613.90         | 1121.19       | 4.19                     | 2634.06         | 1142.97       | 1.72                           | 2702.31         | 1185.30       | 6.54            | 2684.29         | 1175.96       |
| <b>5a</b>     | 1.59                 | 30.47           | 19.48         | 1.64                     | 31.64           | 22.36         | 1.66                           | 32.03           | 25.26         | 1.66            | 31.99           | 25.45         |
| <b>5b</b>     | 4.81                 | 1615.23         | 545.84        | 3.11                     | 1678.65         | 566.99        | 4.93                           | 1694.29         | 575.25        | 4.93            | 1706.25         | 578.57        |
| <b>5c</b>     | 8.75                 | 4467.47         | 1611.75       | 8.71                     | 4476.12         | 1612.41       | 8.99                           | 4626.70         | 1669.42       | 8.88            | 4569.38         | 1643.09       |
| <b>6a</b>     | 2.45                 | 51.77           | 44.37         | 2.56                     | 52.77           | 48.35         | 2.50                           | 45.12           | 45.07         | 2.59            | 51.32           | 61.61         |
| <b>6b</b>     | 6.94                 | 1025.56         | 1175.96       | 7.13                     | 3549.09         | 1248.58       | 7.19                           | 3583.09         | 1281.87       | 7.20            | 3635.82         | 1301.97       |
| <b>6c</b>     | 12.27                | 7164.27         | 2651.87       | 12.37                    | 7234.17         | 2770.52       | 12.68                          | 6729.77         | 2468.62       | 12.64           | 7247.45         | 2758.30       |

<sup>a</sup>For Ca atom aug-pc-2 basis set has been used.

**Table S9** The ratio<sup>a</sup> of  $\chi_{xxxx}$  ( $\gamma_{av}$ ) values of complexes (**Scheme 1**) obtained by different DFT methods and basis sets

| Complexes | 6-311++G(d,p) |               | 6-311++G(3df,3pd) |               | aug-cc-pVTZ   |               | aug-pc-2      |               |
|-----------|---------------|---------------|-------------------|---------------|---------------|---------------|---------------|---------------|
|           | $\chi_{xxxx}$ | $\gamma_{av}$ | $\chi_{xxxx}$     | $\gamma_{av}$ | $\chi_{xxxx}$ | $\gamma_{av}$ | $\chi_{xxxx}$ | $\gamma_{av}$ |
| <b>1c</b> | 1.00          | 1.00          | 1.00              | 1.00          | 1.00          | 1.00          | 1.00          | 1.00          |
| <b>2c</b> | 3.10          | 1.94          | 3.07              | 1.92          | 3.09          | 1.93          | 3.13          | 1.94          |
| <b>3c</b> | 6.62          | 3.05          | 6.59              | 3.08          | 6.82          | 3.16          | 6.72          | 3.11          |
| <b>4c</b> | 9.11          | 4.69          | 9.82              | 4.88          | 9.19          | 4.72          | 9.44          | 4.86          |
| <b>5c</b> | 15.64         | 6.60          | 15.97             | 6.75          | 15.86         | 6.72          | 16.26         | 6.88          |
| <b>6c</b> | 28.87         | 12.12         | 27.26             | 12.00         | 25.46         | 10.72         | 27.65         | 12.22         |

**wB97XD**

|           | $\chi_{xxxx}$ | $\gamma_{av}$ | $\chi_{xxxx}$ | $\gamma_{av}$ | $\chi_{xxxx}$ | $\gamma_{av}$ | $\chi_{xxxx}$ | $\gamma_{av}$ |
|-----------|---------------|---------------|---------------|---------------|---------------|---------------|---------------|---------------|
| <b>1c</b> | 1.00          | 1.00          | 1.00          | 1.00          | 1.00          | 1.00          | 1.00          | 1.00          |
| <b>2c</b> | 2.68          | 1.78          | 2.64          | 1.76          | 2.63          | 1.78          | 2.69          | 1.78          |
| <b>3c</b> | 6.00          | 2.72          | 6.16          | 2.84          | 5.68          | 2.75          | 5.70          | 2.72          |
| <b>4c</b> | 7.77          | 3.81          | 7.78          | 3.92          | 8.79          | 4.19          | 7.74          | 3.95          |
| <b>5c</b> | 12.65         | 5.14          | 12.77         | 5.34          | 12.86         | 5.39          | 12.82         | 5.35          |
| <b>6c</b> | 21.72         | 8.69          | 23.01         | 9.61          | 22.16         | 8.62          | 23.08         | 9.68          |

**B2PLYP**

|           | $\chi_{xxxx}$ | $\gamma_{av}$ | $\chi_{xxxx}$ | $\gamma_{av}$ | $\chi_{xxxx}$ | $\gamma_{av}$ | $\chi_{xxxx}$ | $\gamma_{av}$ |
|-----------|---------------|---------------|---------------|---------------|---------------|---------------|---------------|---------------|
| <b>1c</b> | 1.00          | 1.00          | 1.00          | 1.00          | 1.00          | 1.00          | 1.00          | 1.00          |
| <b>2c</b> | 3.41          | 2.13          | 3.41          | 2.12          | 3.30          | 2.09          | 3.44          | 2.12          |
| <b>3c</b> | 7.37          | 3.39          | 7.36          | 3.38          | 7.18          | 3.35          | 7.41          | 3.38          |
| <b>4c</b> | 10.50         | 5.10          | 10.95         | 5.34          | 9.19          | 4.72          | 10.96         | 5.39          |
| <b>5c</b> | 17.95         | 7.34          | 18.61         | 7.53          | 18.12         | 7.30          | 18.66         | 7.53          |
| <b>6c</b> | 28.79         | 12.07         | 30.08         | 12.94         | 23.08         | 10.80         | 29.59         | 12.64         |

<sup>a</sup>Ratio of  $\chi_{xxxx}$  ( $\gamma_{av}$ ) refer to the quantity obtained with respect to that of complex **1c**.

**Table S10** Longitudinal component of second hyperpolarizability ( $\gamma_{xxxx}$ ,  $10^4$  au) of Complexes with  $n = 2 - 7$  (Schemes 2A and 2B) obtained at the CAM-B3LYP level for the 6-311++G(3df,3pd) basis set

|          | $\text{H}_2\text{N}-(\text{Be})_n-\text{NH}_2$ | $\text{H}_2\text{N}-(\text{Mg})_n-\text{NH}_2$ | $\text{H}_2\text{N}-(\text{Ca})_n-\text{NH}_2$ | $\text{Li}_2\text{N}-(\text{Mg})_n-\text{NLi}_2$ | $\text{Li}_2\text{N}-(\text{Ca})_n-\text{NLi}_2$ |
|----------|------------------------------------------------|------------------------------------------------|------------------------------------------------|--------------------------------------------------|--------------------------------------------------|
| <b>n</b> | $\gamma_{xxxx}$                                | $\gamma_{xxxx}$                                | $\gamma_{xxxx}$                                | $\gamma_{xxxx}$                                  | $\gamma_{xxxx}$                                  |
| <b>2</b> | 4.50                                           | 13.52                                          | 46.91                                          | 485.93                                           | 2566.97                                          |
| <b>3</b> | 10.45                                          | 58.85                                          | 285.08                                         | 1476.34                                          | 8633.63                                          |
| <b>4</b> | 16.99                                          | 188.98                                         | 886.70                                         | 3238.86                                          | 18244.60                                         |
| <b>5</b> | 23.34                                          | 480.23                                         | 2084.42                                        | 5668.54                                          | 31844.30                                         |
| <b>6</b> | 29.21                                          | 1045.96                                        | 4150.34                                        | 9244.70                                          | 50124.50                                         |
| <b>7</b> | 34.57                                          | 2049.08                                        | 7347.07                                        | 13566.50                                         | 71896.60                                         |

**Table S11** The **c** values in the power-law dependence of the longitudinal component of second hyperpolarizability on '**n**' obtained for **Be** and **Mg** metal chain complexes (**n** = 1 - 7) encapped by NH<sub>2</sub> groups . The values in parentheses are the errors in the fitting of the corresponding equations obtained from  $\gamma_{xxxx}$  values calculated at different methods for the 6-311++G(d,p) basis set

| <b>H<sub>2</sub>N-(Be)<sub>n</sub>-NH<sub>2</sub></b> |                 |                     |
|-------------------------------------------------------|-----------------|---------------------|
|                                                       | $\gamma = bn^c$ | $\gamma = a + bn^c$ |
| <b>CAM-B3LYP</b>                                      | 1.43(±0.0915)   | 1.14(±0.1033)       |
| <b>CCSD(T)</b>                                        | 1.64(±0.1075)   | 1.74(±0.2343)       |
| <b>MP2</b>                                            | 1.45(±0.0722)   | 1.23(±0.0906)       |
| <b>H<sub>2</sub>N-(Mg)<sub>n</sub>-NH<sub>2</sub></b> |                 |                     |
|                                                       | $\gamma = bn^c$ | $\gamma = a + bn^c$ |
| <b>CAM-B3LYP</b>                                      | 4.33(±0.0222)   | 4.36(±0.0210)       |
| <b>CCSD(T)</b>                                        | 4.31(±0.0248)   | 4.34(±0.0222)       |
| <b>MP2</b>                                            | 4.13(±0.0087)   | 4.13(±0.0121)       |

**Table S12** Transition energy ( $\Delta E_{ng}$ , au), change in dipole moment ( $\Delta \mu_{ng}$ , au), oscillator strength ( $f_{ng}$ , au), state wise contribution of  $\beta_0$  and  $\beta_0$  (total) along with the major transitions<sup>a</sup> involved in the crucial excitation<sup>b</sup> for complexes (Scheme 1(A-C)) obtained at the TD-CAM-B3LYP/6-311++G(d,p) level.

| Complexes | $S_0 \rightarrow S_n$    | $\Delta \mu_{ng}$ | $\Delta E_{gn}$ | $f_{ng}$ | $\beta_0$ (State Wise) | $\beta_0$ (total) <sup>a</sup> |
|-----------|--------------------------|-------------------|-----------------|----------|------------------------|--------------------------------|
| 2a        | $S_0 \rightarrow S_7$    | 0.022             | 0.205           | 0.49     | 1.25                   | 20.72                          |
|           | $S_0 \rightarrow S_4$    | 0.299             | 0.173           | 0.33     | 19.05                  |                                |
|           | $S_0 \rightarrow S_5$    | 0.323             | 0.177           | 0.23     | 0.419                  |                                |
| 2b        | $S_0 \rightarrow S_3$    | 3.606             | 0.088           | 0.17     | 904.84                 | 1518.39                        |
|           | $S_0 \rightarrow S_7$    | 5.138             | 0.104           | 0.08     | 365.41                 |                                |
|           | $S_0 \rightarrow S_9$    | 4.222             | 0.106           | 0.07     | 248.14                 |                                |
| 2c        | $S_0 \rightarrow S_4$    | 2.645             | 0.066           | 0.16     | 1481.22                | 2939.87                        |
|           | $S_0 \rightarrow S_8$    | 3.402             | 0.083           | 0.15     | 879.68                 |                                |
|           | $S_0 \rightarrow S_7$    | 3.009             | 0.080           | 0.10     | 578.97                 |                                |
| 4a        | $S_0 \rightarrow S_1$    | 1.210             | 0.116           | 0.18     | 139.53                 | 296.45                         |
|           | $S_0 \rightarrow S_3$    | 1.486             | 0.135           | 0.21     | 126.83                 |                                |
|           | $S_0 \rightarrow S_4$    | 0.289             | 0.136           | 0.27     | 30.90                  |                                |
| 4b        | $S_0 \rightarrow S_1$    | 1.492             | 0.066           | 0.21     | 1110.58                | 2791.76                        |
|           | $S_0 \rightarrow S_3$    | 3.678             | 0.083           | 0.17     | 1093.52                |                                |
|           | $S_0 \rightarrow S_5$    | 4.010             | 0.085           | 0.09     | 587.66                 |                                |
| 4c        | $S_0 \rightarrow S_2$    | 0.385             | 0.055           | 0.28     | 659.50                 | 3137.65                        |
|           | $S_0 \rightarrow S_6$    | 0.874             | 0.073           | 0.09     | 471.80                 |                                |
|           | $S_0 \rightarrow S_8$    | 4.979             | 0.075           | 0.21     | 2006.35                |                                |
| 5a        | $S_0 \rightarrow S_1$    | 0.145             | 0.110           | 0.28     | 30.39                  | 129.69                         |
|           | $S_0 \rightarrow S_3$    | 0.615             | 0.125           | 0.30     | 15.51                  |                                |
|           | $S_0 \rightarrow S_2$    | 0.409             | 0.123           | 0.24     | 84.09                  |                                |
| 5b        | $S_0 \rightarrow S_1$    | 0.477             | 0.065           | 0.34     | 592.29                 | 764.28                         |
|           | $S_0 \rightarrow S_6$    | 0.615             | 0.082           | 0.09     | 100.39                 |                                |
|           | $S_0 \rightarrow S_7$    | 0.409             | 0.083           | 0.10     | 71.60                  |                                |
| 5c        | $S_0 \rightarrow S_3$    | 1.043             | 0.053           | 0.46     | 3243.68                | 6713.18                        |
|           | $S_0 \rightarrow S_9$    | 3.998             | 0.073           | 0.22     | 2260.98                |                                |
|           | $S_0 \rightarrow S_{10}$ | 2.332             | 0.074           | 0.21     | 1208.52                |                                |

<sup>a</sup>In the last column the value against each complex are obtained by summing the state wise contribution of  $\beta_0$ .

**Table S13** Transition energy ( $\Delta E_{\text{ng}}$ , au), x-component of ground and excited state dipole moment (Debye), dipole moment difference ( $(\Delta\mu^x)_{\text{ng}}$ , au), oscillator strength ( $(f^x)_{\text{ng}}$ , au) along with the two state contribution of second hyperpolarizability (au) calculated from the crucial electronic transition obtained for complexes (**Scheme 1(A-C)**) at the TD-CAM-B3LYP/6-311++G(d,p) level

| Complexes | Excited State Dipole Moment | Ground State Dipole Moment | $(\Delta\mu^x)_{\text{ng}}$ | $\Delta E_{\text{ng}}$ | $(f^x)_{\text{ng}}$ | $ \gamma_{xxxx}^{2L} $ |
|-----------|-----------------------------|----------------------------|-----------------------------|------------------------|---------------------|------------------------|
| <b>1a</b> |                             |                            |                             | 0.238                  | 0.324               | 7423.33                |
| <b>1b</b> |                             |                            |                             | 0.110                  | 0.192               | 123604.07              |
| <b>1c</b> |                             |                            |                             | 0.088                  | 0.199               | 405215.97              |
| <b>2a</b> | 1.682                       | 1.620                      | 0.022                       | 0.205                  | 0.488               | 35514.46               |
| <b>2b</b> | 9.963                       | 0.797                      | 3.606                       | 0.088                  | 0.171               | 1035602.14             |
| <b>2c</b> | 7.054                       | 0.332                      | 2.645                       | 0.066                  | 0.161               | 1019295.87             |
| <b>3a</b> |                             |                            |                             | 0.178                  | 0.621               | 116540.52              |
| <b>3b</b> |                             |                            |                             | 0.084                  | 0.334               | 1440423.72             |
| <b>3c</b> |                             |                            |                             | 0.062                  | 0.362               | 7724181.20             |
| <b>4a</b> | 1.969                       | 1.235                      | 0.289                       | 0.117                  | 0.178               | 75181.59               |
| <b>4b</b> | 5.658                       | 1.864                      | 1.492                       | 0.066                  | 0.214               | 245578.06              |
| <b>4c</b> | 2.228                       | 1.249                      | 0.385                       | 0.055                  | 0.285               | 8548857.95             |
| <b>5a</b> | 2.176                       | 2.544                      | 0.145                       | 0.110                  | 0.279               | 259556.58              |
| <b>5b</b> | 3.922                       | 2.703                      | 0.477                       | 0.065                  | 0.341               | 5255251.90             |
| <b>5c</b> | 0.221                       | 2.873                      | 1.043                       | 0.053                  | 0.463               | 26664879.28            |
| <b>6a</b> |                             |                            |                             | 0.091                  | 0.495               | 2120299.43             |
| <b>6b</b> |                             |                            |                             | 0.056                  | 0.489               | 23446139.41            |
| <b>6c</b> |                             |                            |                             | 0.048                  | 0.605               | 77570809.26            |

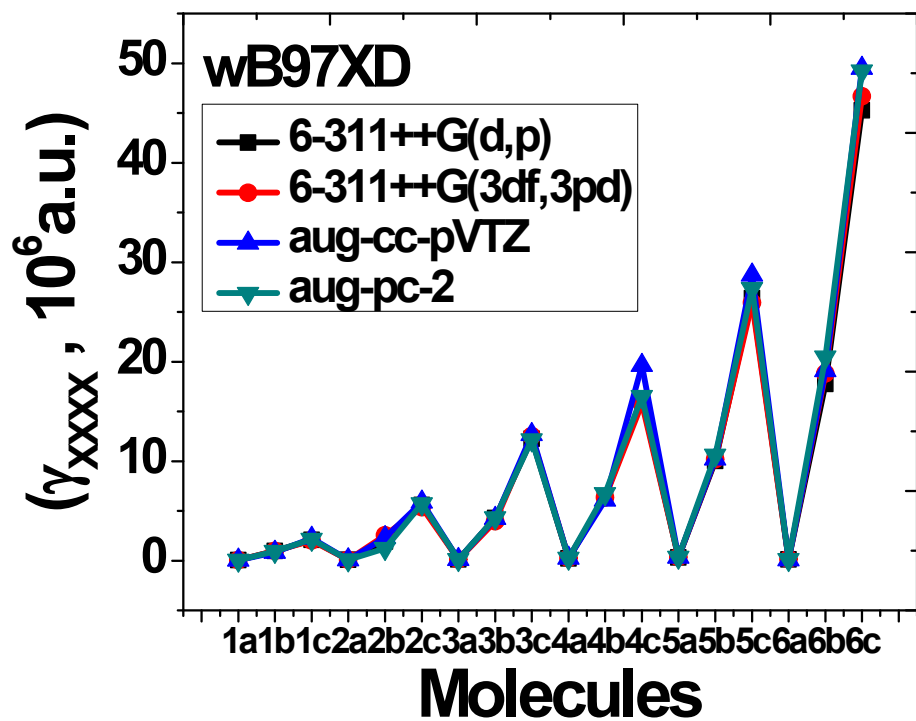

Fig.S1 Plot of  $\gamma_{xxxx}$  of molecules (Scheme 1) obtained at different basis sets for the wB97XD functional.

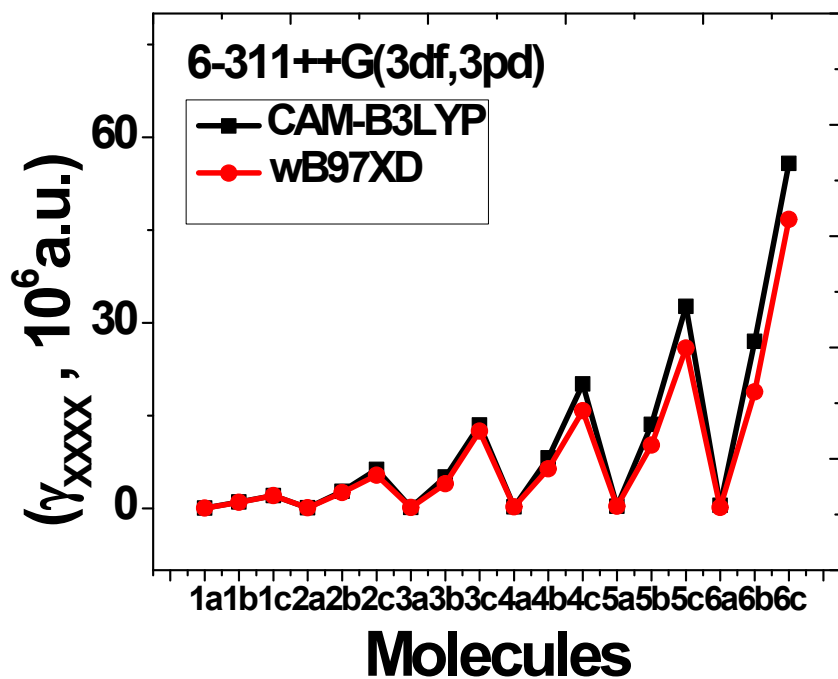

Fig. S2 Plot of  $\gamma_{xxxx}$  of molecules (Scheme 1) obtained at two different DFT functionals for the 6-311++G(3df,3pd) basis set



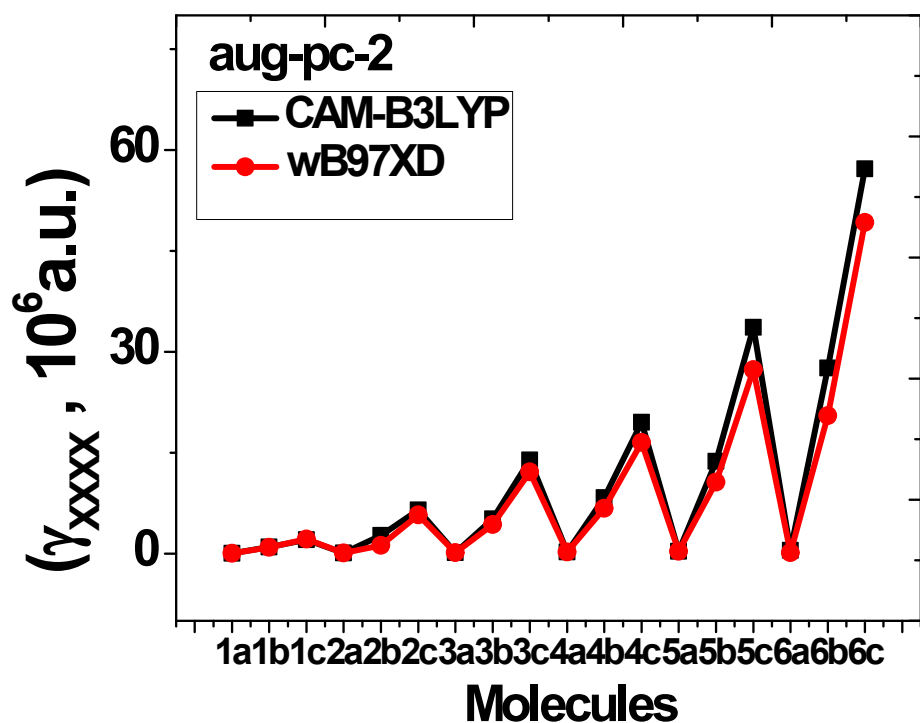

**Fig. S3** Plot of  $\gamma_{xxxx}$  of molecules (Scheme 1) obtained at two different DFT functional for the aug-pc-2 basis set.

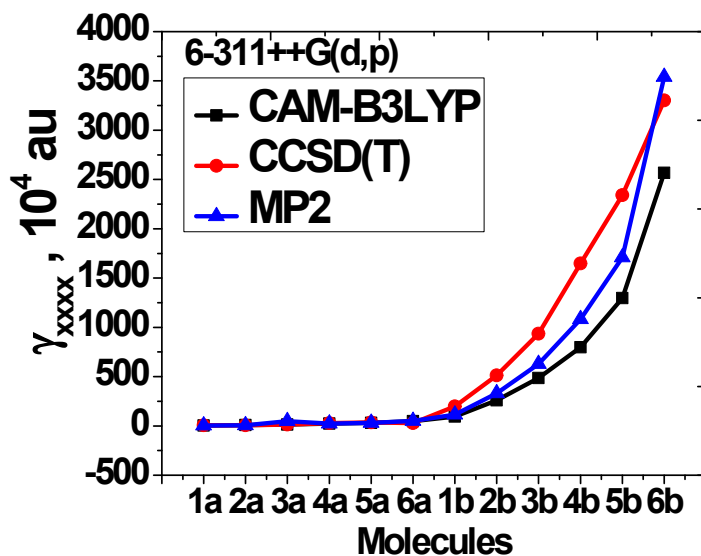

**Fig. S4** The variation of  $\gamma_{xxxx}$  of complexes of Schemes 1A and 1B obtained at the CAM-B3LYP, CCSD(T), MP2 levels for 6-311++G(d,p) basis set.

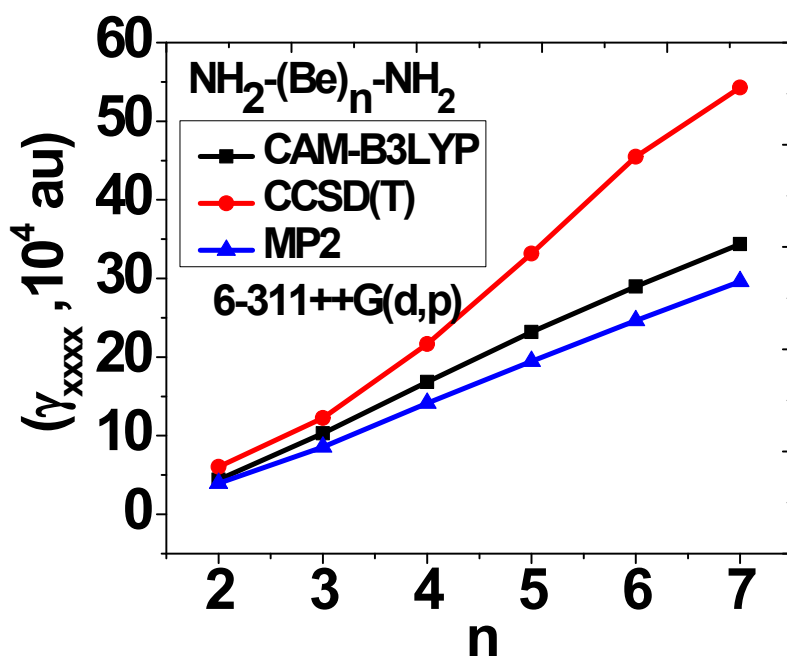

**Fig.S5** The variation of  $\gamma_{xxxx}$  of  $\text{Be}_n(\text{NH}_2)_2$  [ $n = 2 - 7$ ] complexes obtained at the CAM-B3LYP, CCSD(T) and MP2 levels for the 6-311++G(d,p) basis set.

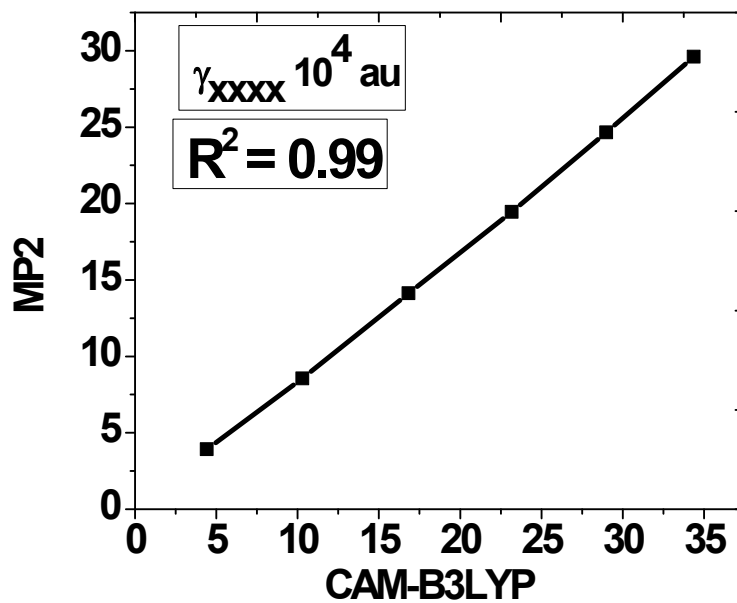

**Fig. S6** The plot of MP2  $\gamma_{xxxx}$  versus CAM-B3LYP  $\gamma_{xxxx}$  obtained for  $\text{Be}_n(\text{NH}_2)_2$  [ $n = 2 - 7$ ] complexes for the 6-311++G(d,p) basis set.

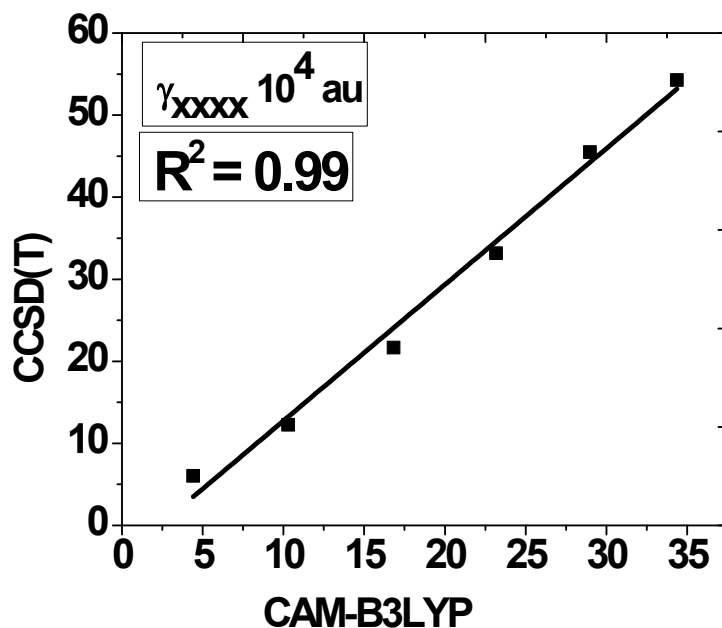

**Fig. S7** The plot of CCSD(T)  $\gamma_{xxxx}$  versus CAM-B3LYP  $\gamma_{xxxx}$  obtained for  $\text{Be}_n(\text{NH}_2)_2$  [ $n = 2 - 7$ ] complexes for the 6-311++G(d,p) basis set.

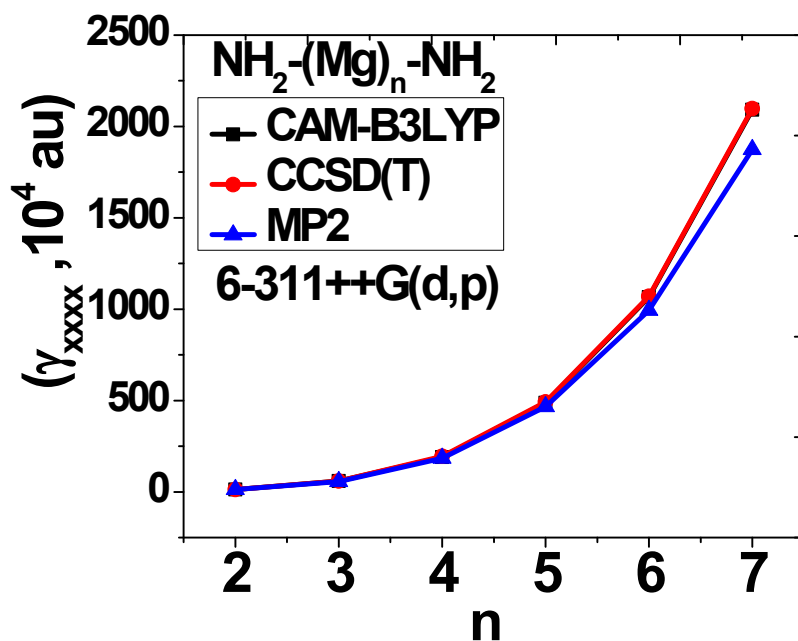

**Fig. S8** The variation of  $\gamma_{xxxx}$  of  $\text{Mg}_n(\text{NH}_2)_2$  [ $n = 2 - 7$ ] complexes obtained at the CAM-B3LYP, CCSD(T) and MP2 levels for the 6-311++G(d,p) basis set.

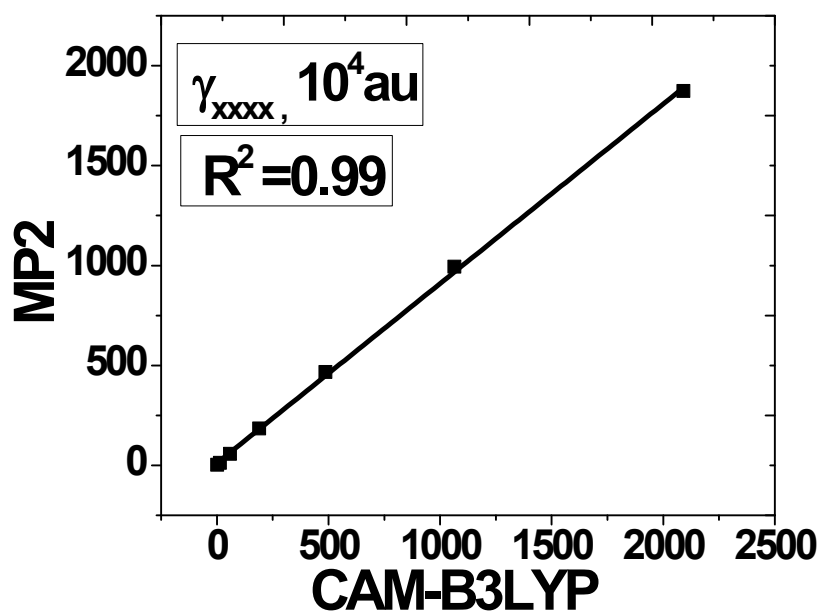

**Fig. S9** The plot of MP2  $\gamma_{xxxx}$  versus CAM-B3LYP  $\gamma_{xxxx}$  obtained for  $\text{Mg}_n(\text{NH}_2)_2$  [ $n = 2 - 7$ ] complexes for the 6-311++G(d,p) basis set.

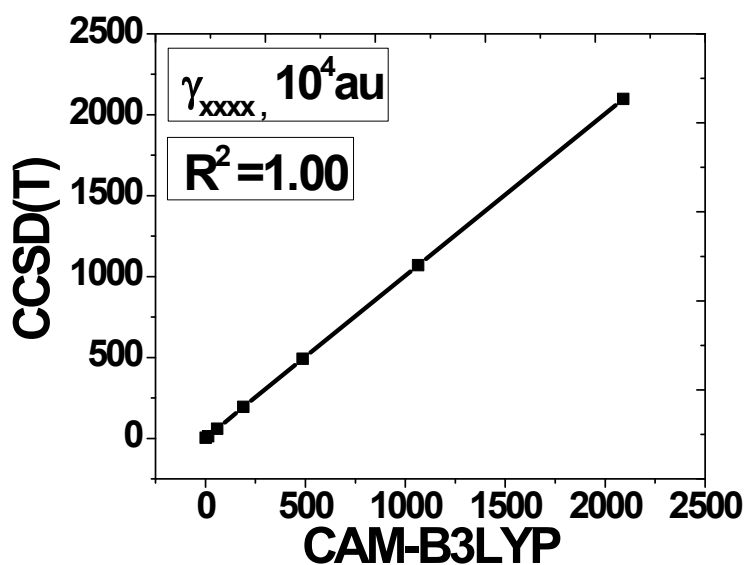

**Fig. S10** The plot of CCSD(T)  $\gamma_{xxxx}$  versus CAM-B3LYP  $\gamma_{xxxx}$  obtained for  $\text{Mg}_n(\text{NH}_2)_2$  [ $n = 2 - 7$ ] complexes for the 6-311++G(d,p) basis set.

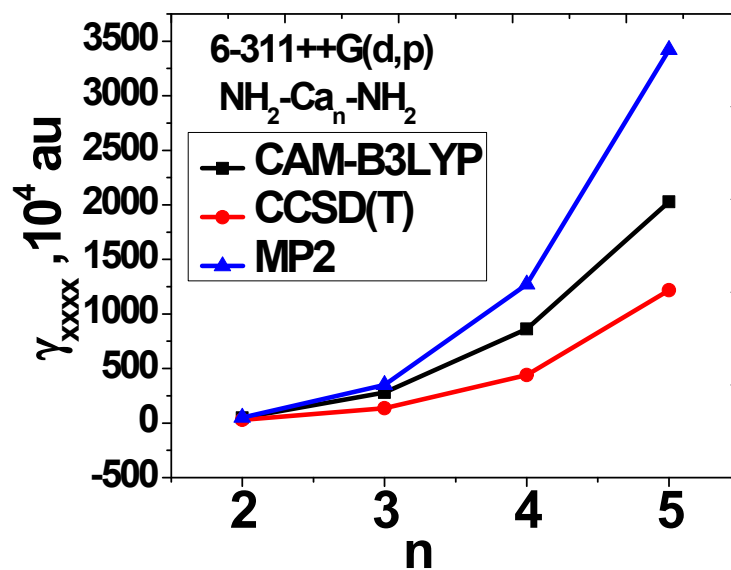

**Fig. S11** The variation of  $\gamma_{xxxx}$  of  $\text{Ca}_n(\text{NH}_2)_2$  [ $n = 1 - 5$ ] complexes obtained at the CAM-B3LYP, CCSD(T) and MP2 levels for the 6-311++G(d,p) basis set.

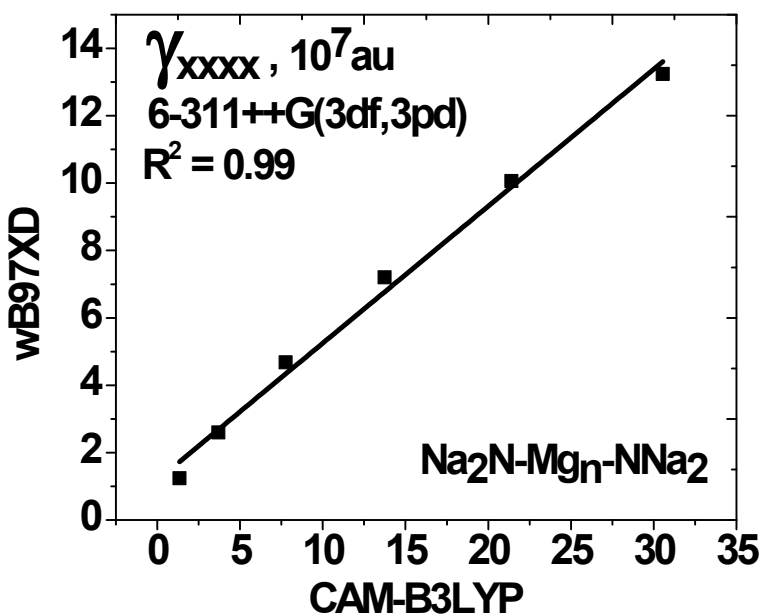

**Fig. S12** The plot of wb97XD  $\gamma_{xxxx}$  versus CAM-B3LYP  $\gamma_{xxxx}$  obtained for  $\text{Mg}_n(\text{NNa}_2)_2$  [ $n = 2 - 7$ ] complexes for the 6-311++G(3df,3pd) basis set.

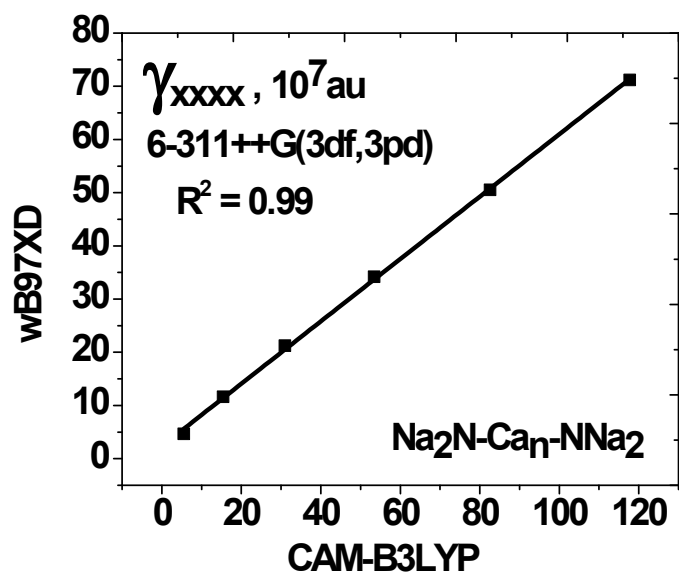

**Fig. S13** The plot of wb97XD  $\gamma_{xxxx}$  versus CAM-B3LYP  $\gamma_{xxxx}$  obtained for  $\text{Ca}_n(\text{NNa}_2)_2$  [ $n = 2 - 7$ ] complexes for the 6-311++G(3df,3pd) basis set.
